# Supplementary material
Source: Springer Nature journal article supplement (https://www.springermedizin.de/resource/supplementary/13633_2011_22_MOESM1_ESM.pdf/9595530)

AQP2-  
BSA

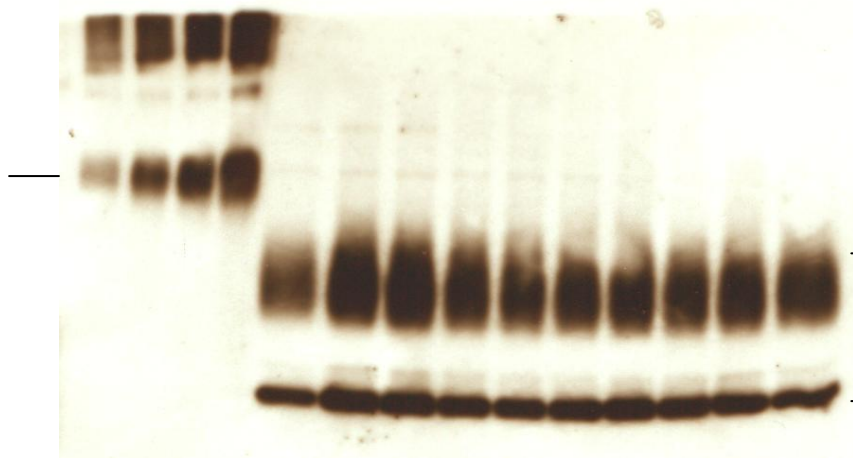

Glycosylated-AQP2

Nonglycosylated-AQP2

5 100 150 200

AQP2-BSA  
(ng)

- 60 - 30 30 60 90 120 150 180 210 240

Time  
(min)

Supplement: MOESM1 [file 9595530]
